# Supplementary material for: A systematic review of measures of implementation players and processes: Summarizing the dearth of psychometric evidence
Source: PubMed Central journal article supplement — Implement Res Pract. 2021 Apr 6;2:26334895211002474. doi: 10.1177/26334895211002474 (PMC9978628; doi:10.1177/26334895211002474), 2021-04-06

Appendix

Figure A1

Structural Characteristics PRISMA Flowchart

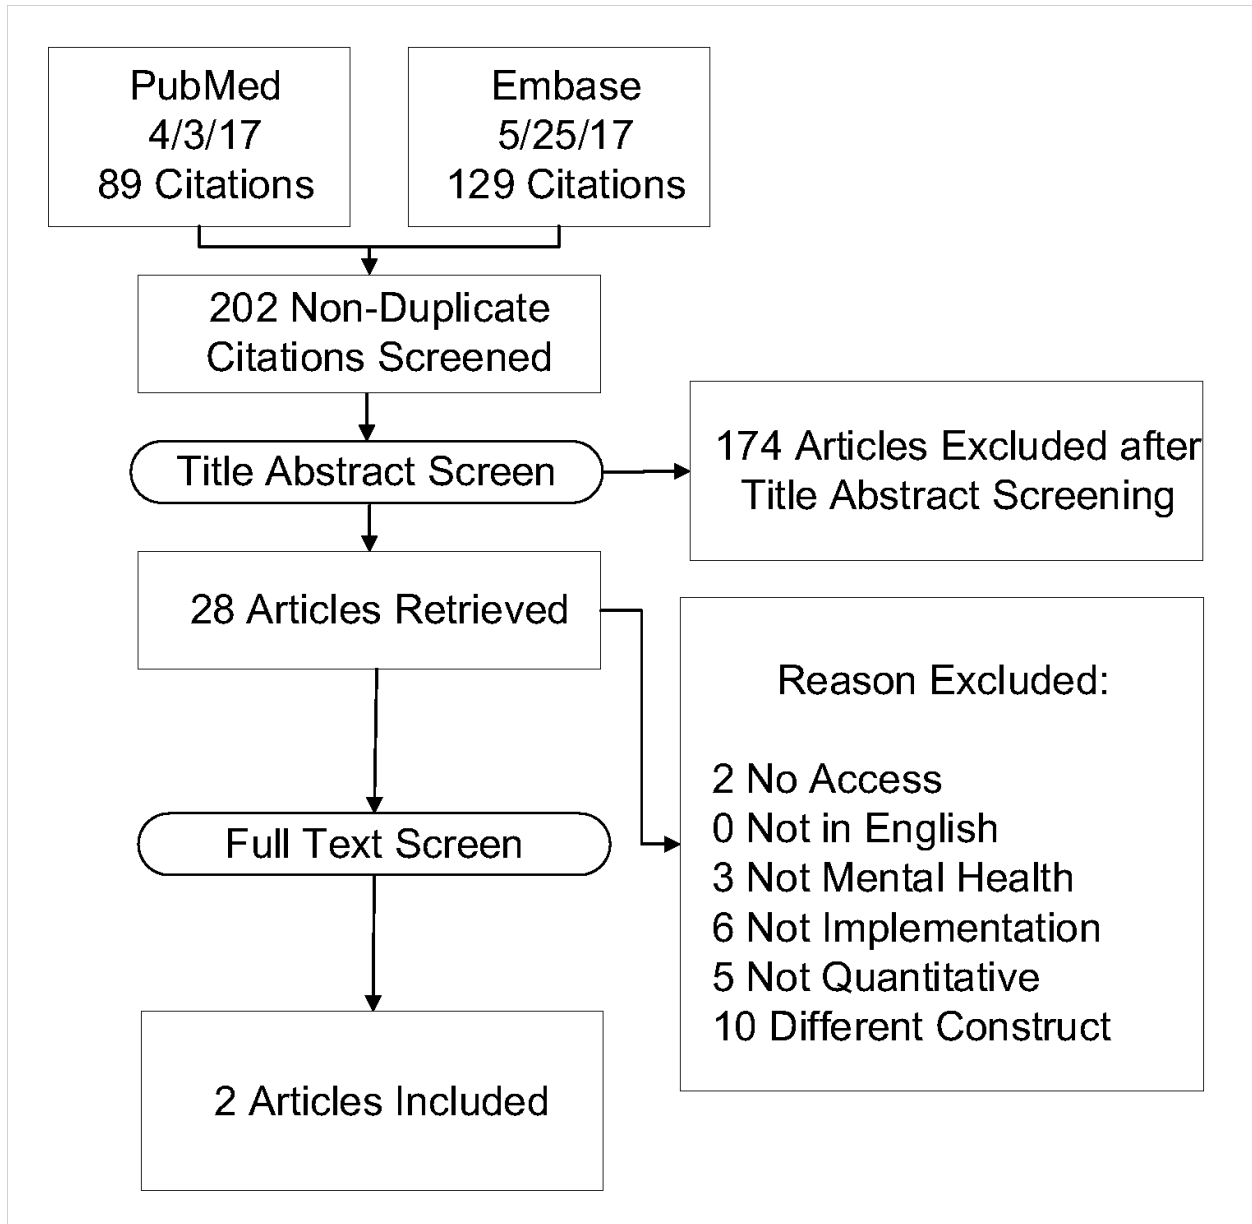

**Figure A2**

*Networks and Communications PRISMA Flowchart*

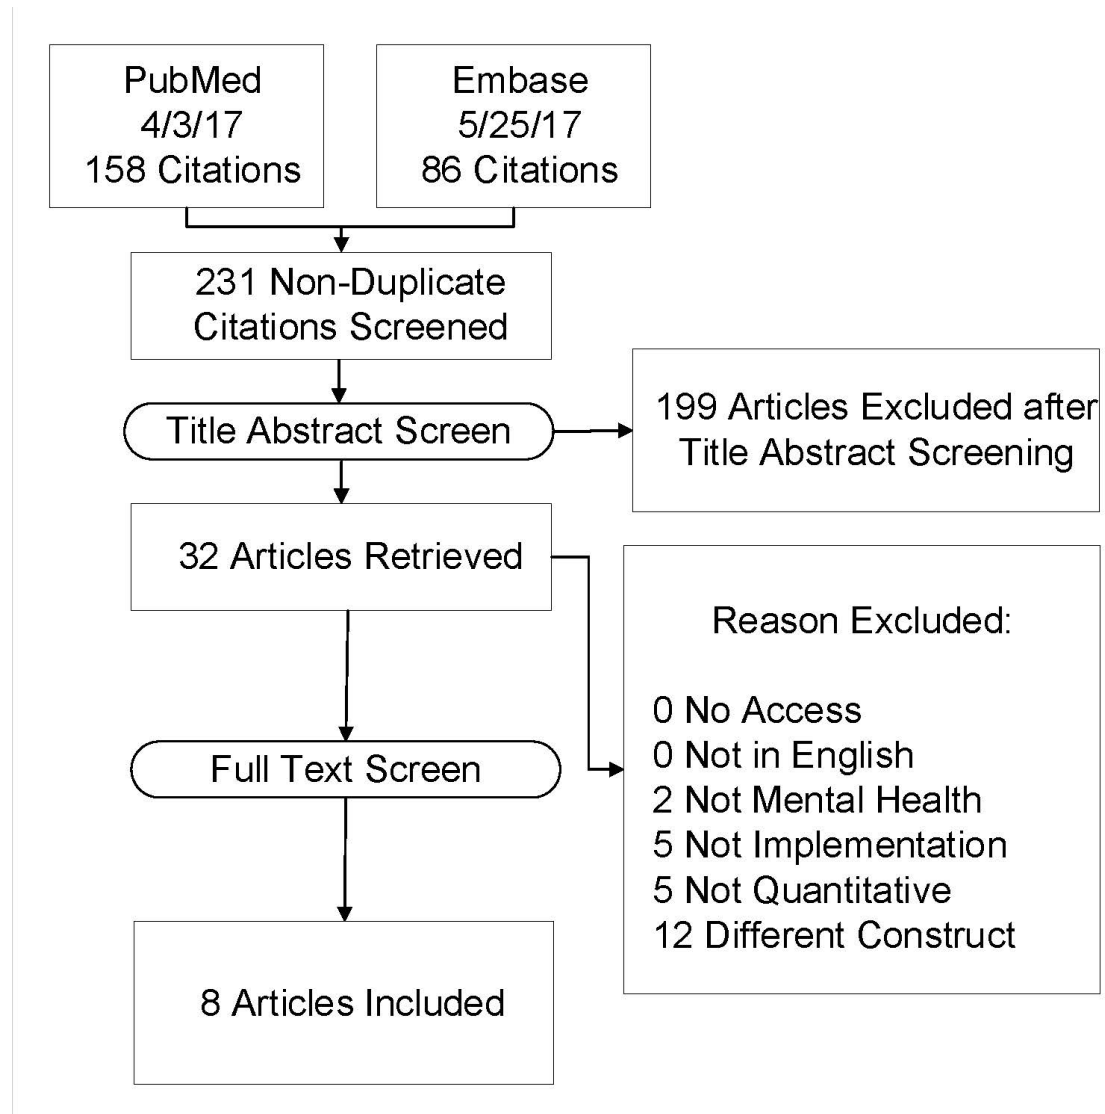

**Figure A3**

*Planning PRISMA Flowchart*

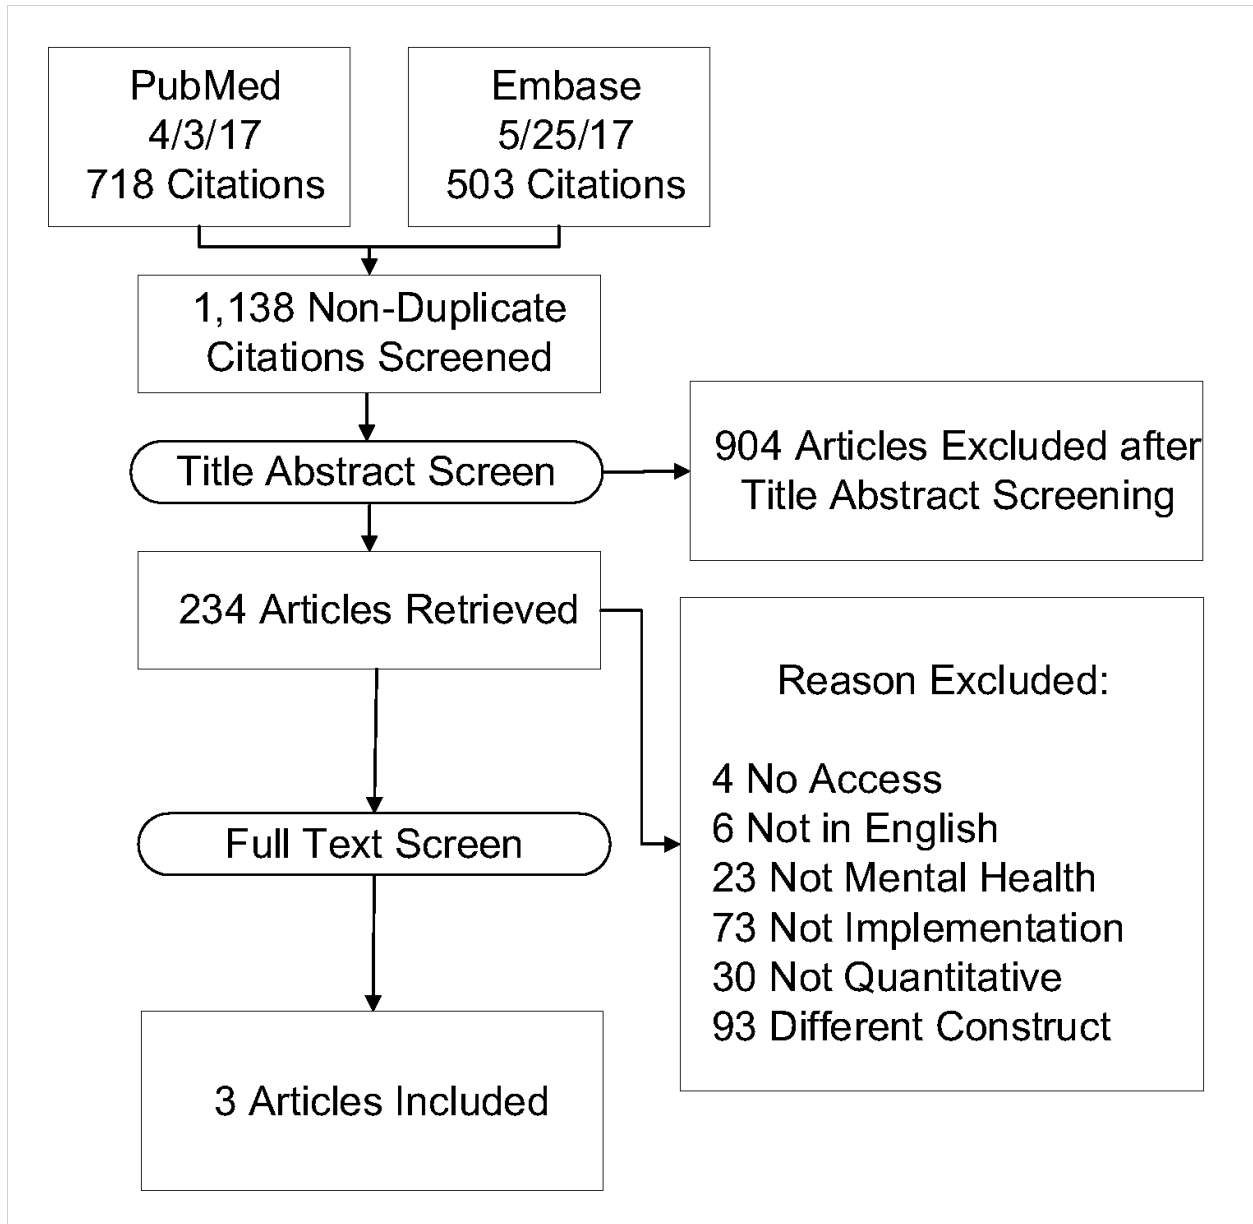

**Figure A4**

*Executing PRISMA Flowchart*

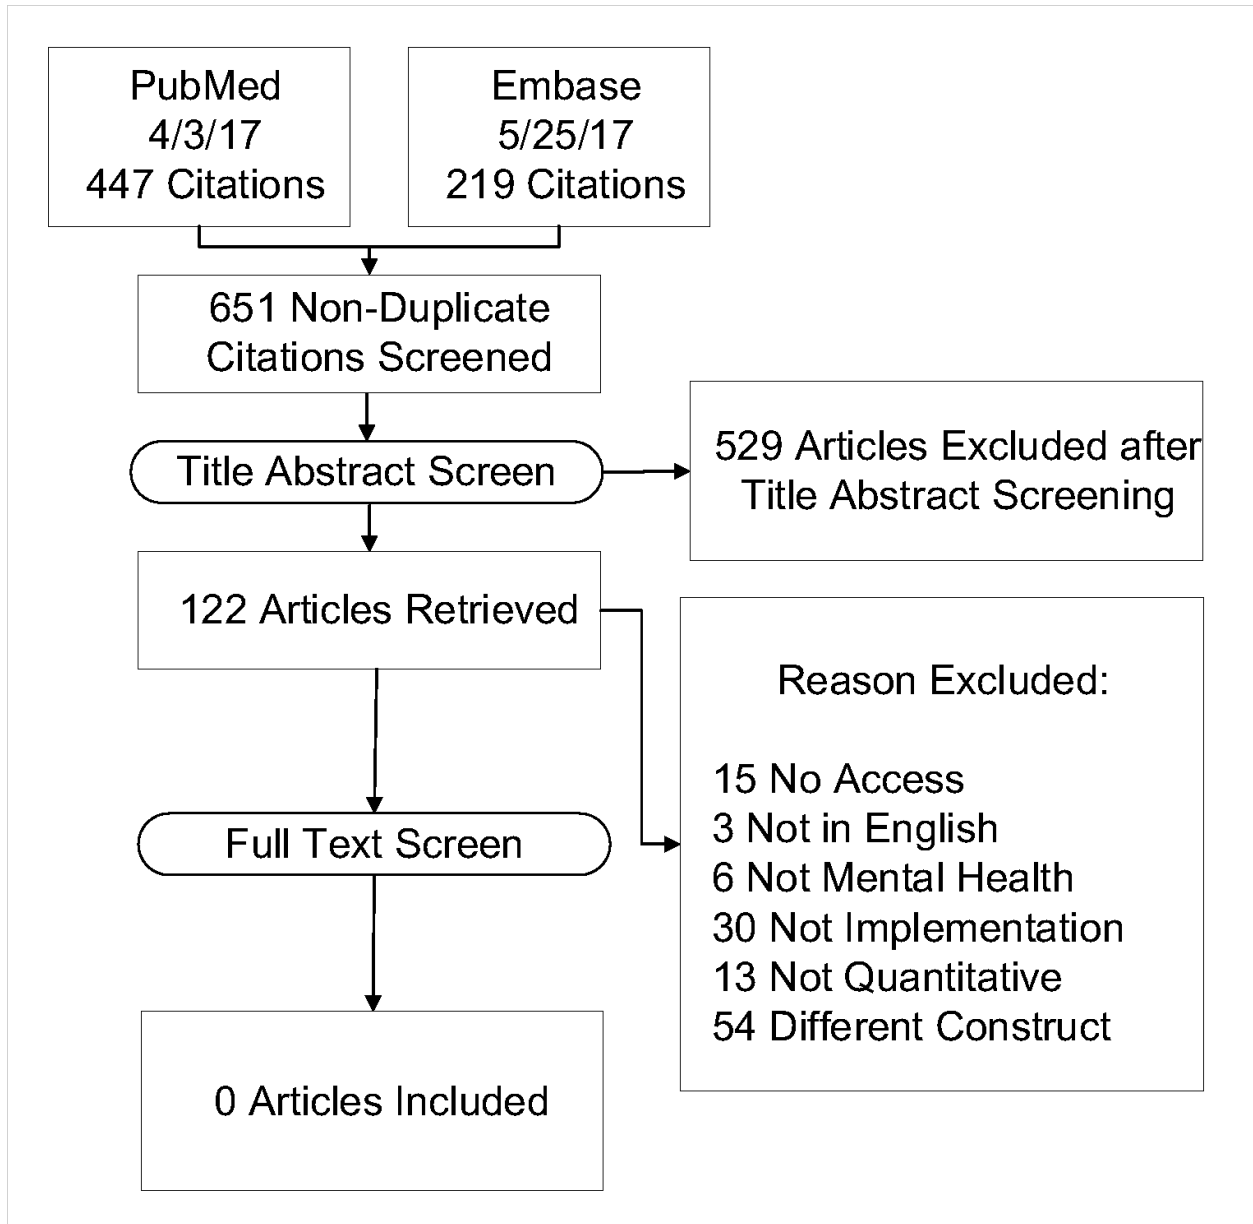

Figure A5

Reflecting and Evaluating PRISMA Flowchart

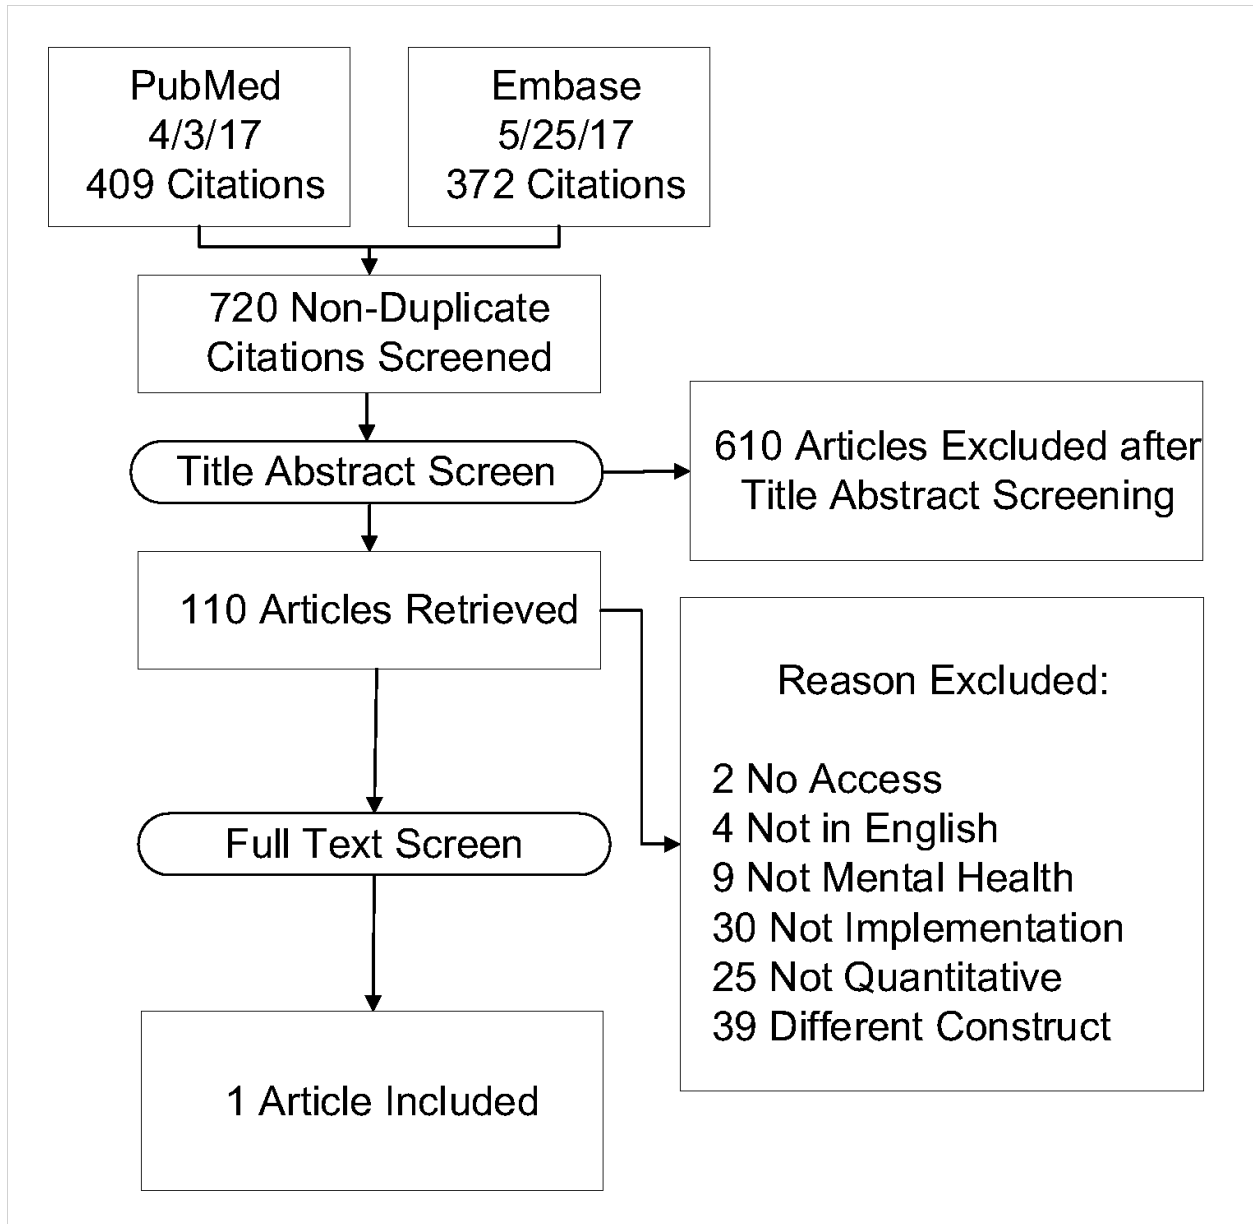

**Figure A6**

*Engaging PRISMA Flowchart*

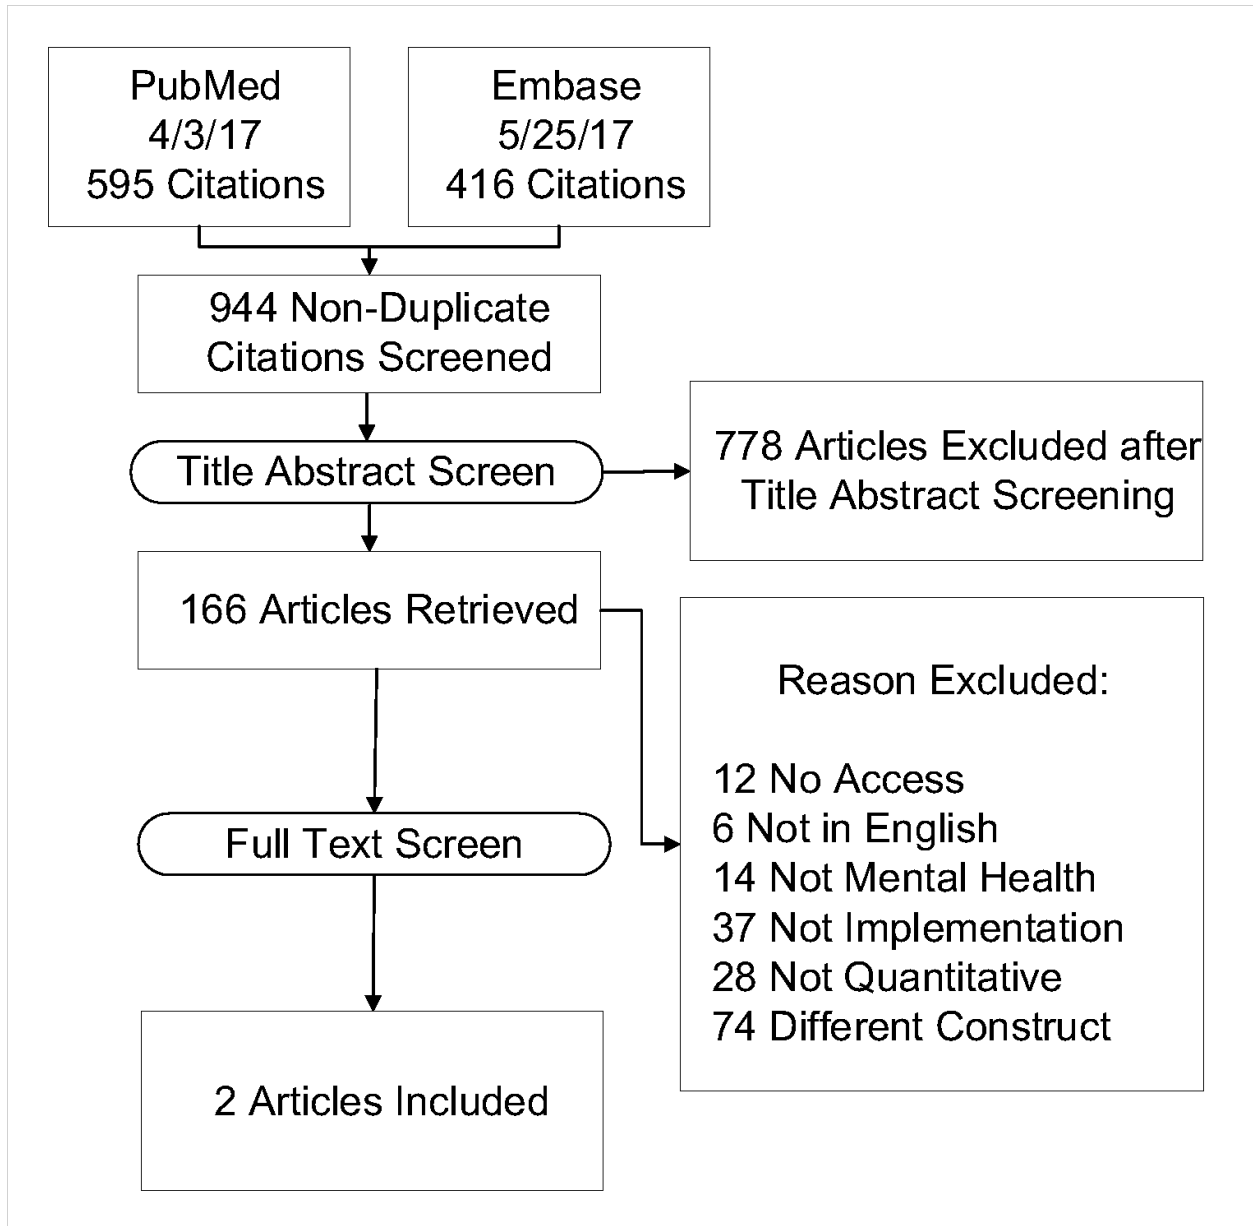

**Figure A7**

*Champions PRISMA Flowchart*

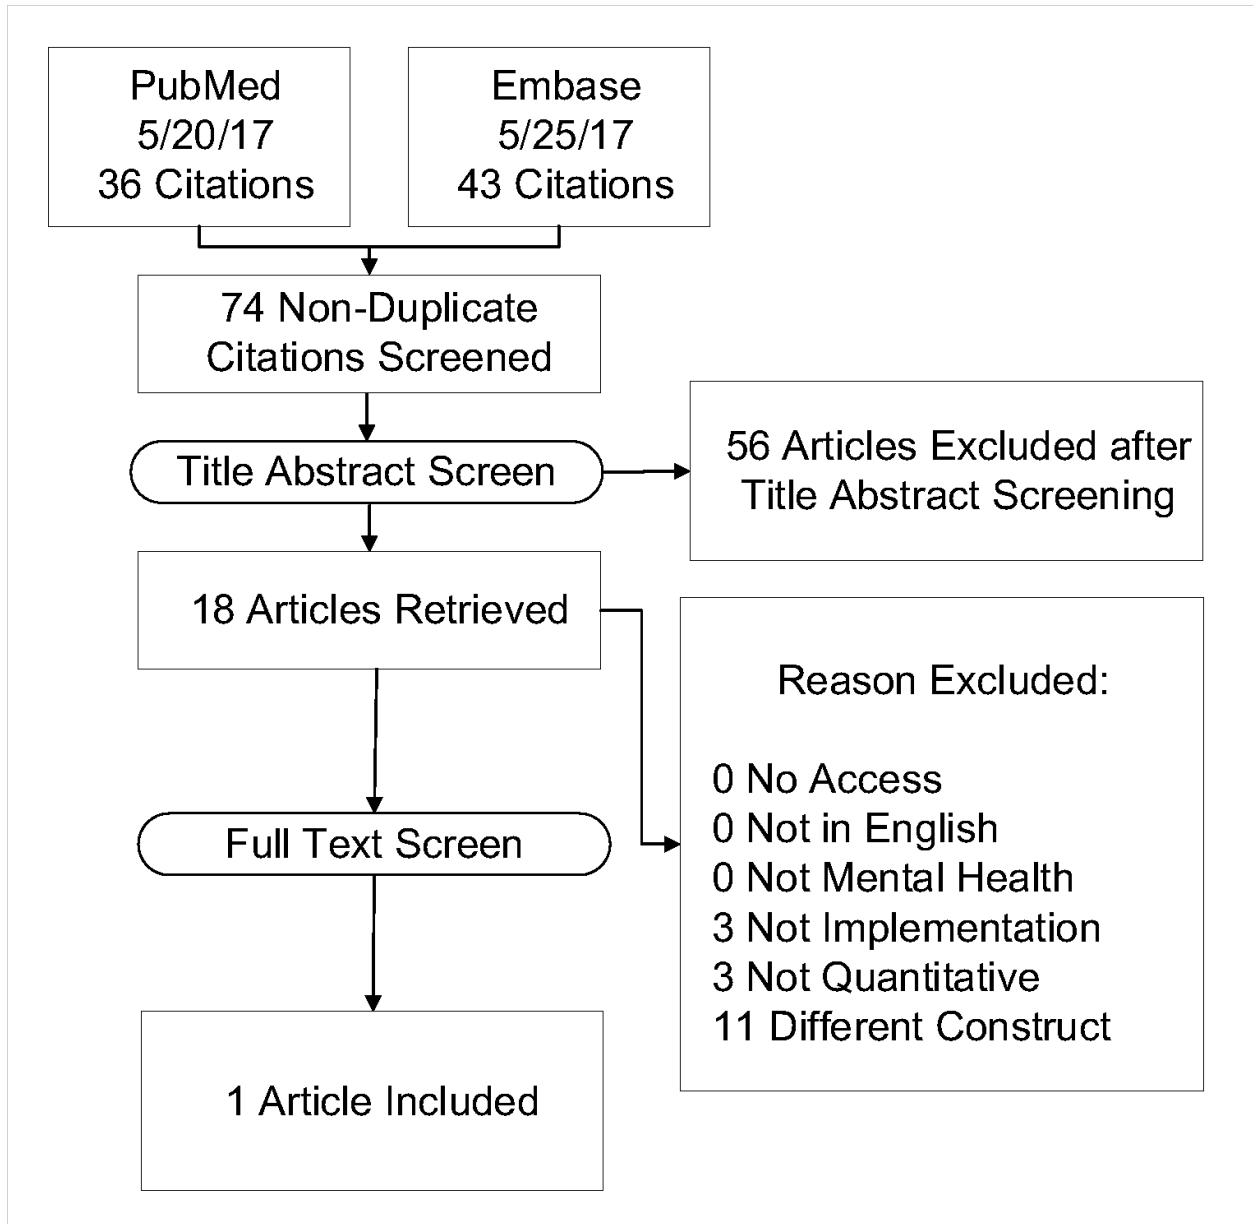

**Figure A8**

*External Change Agents PRISMA Flowchart*

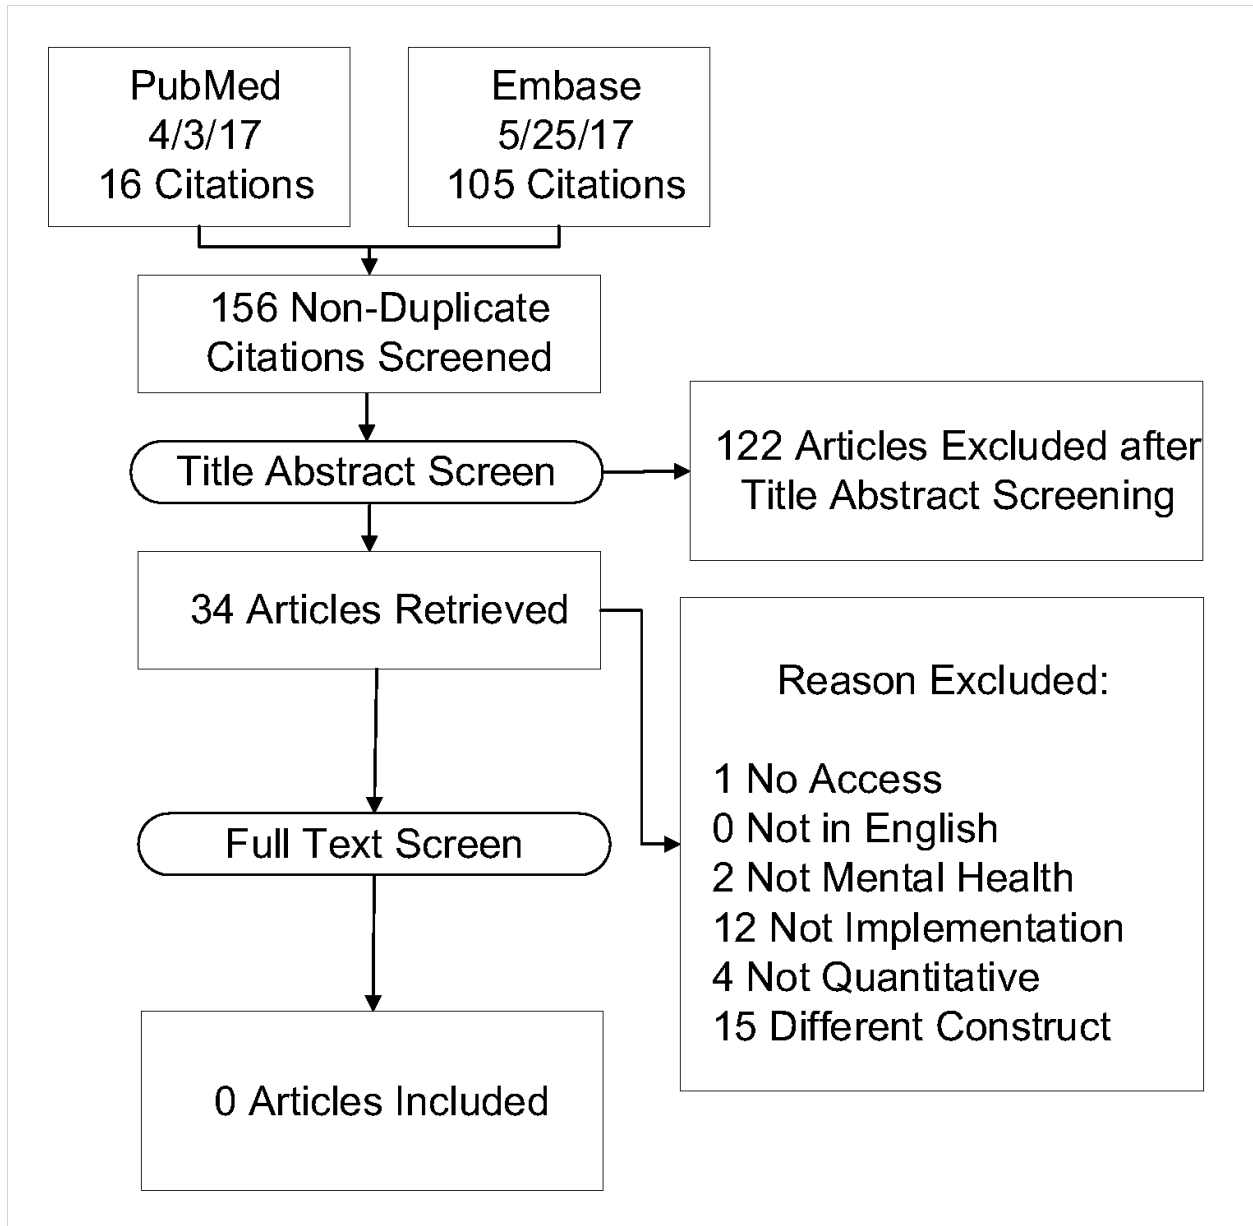



**Figure A9**

*Opinion Leaders PRISMA Flowchart*

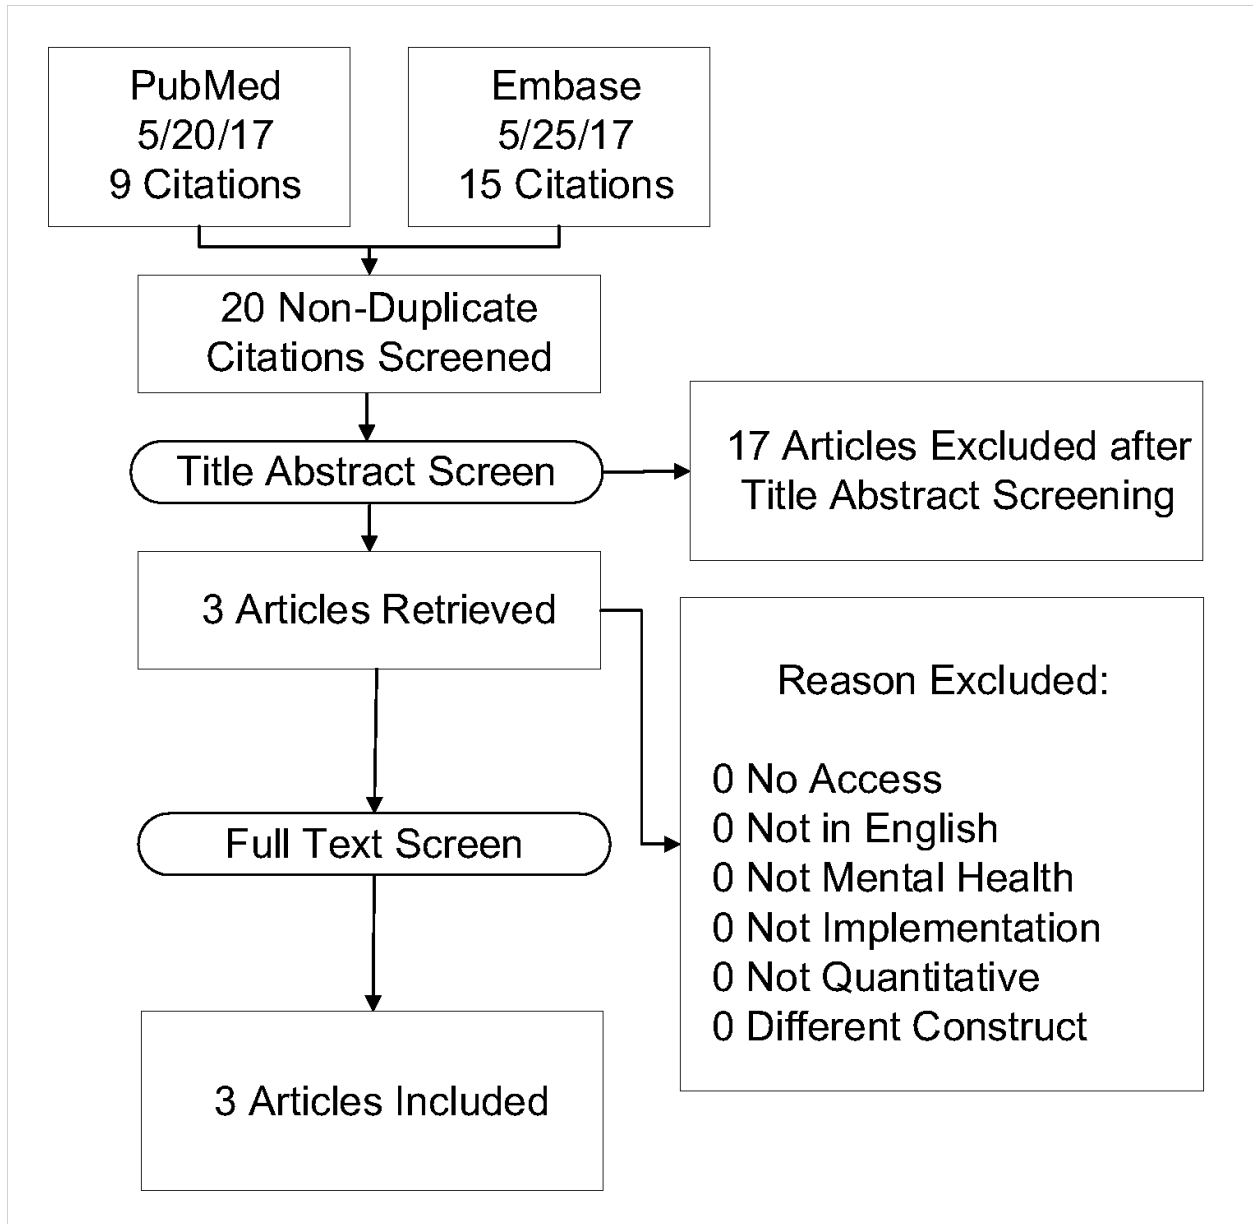

**Figure A10**

*Formally Appointed Internal Implementation Leaders PRISMA Flowchart*

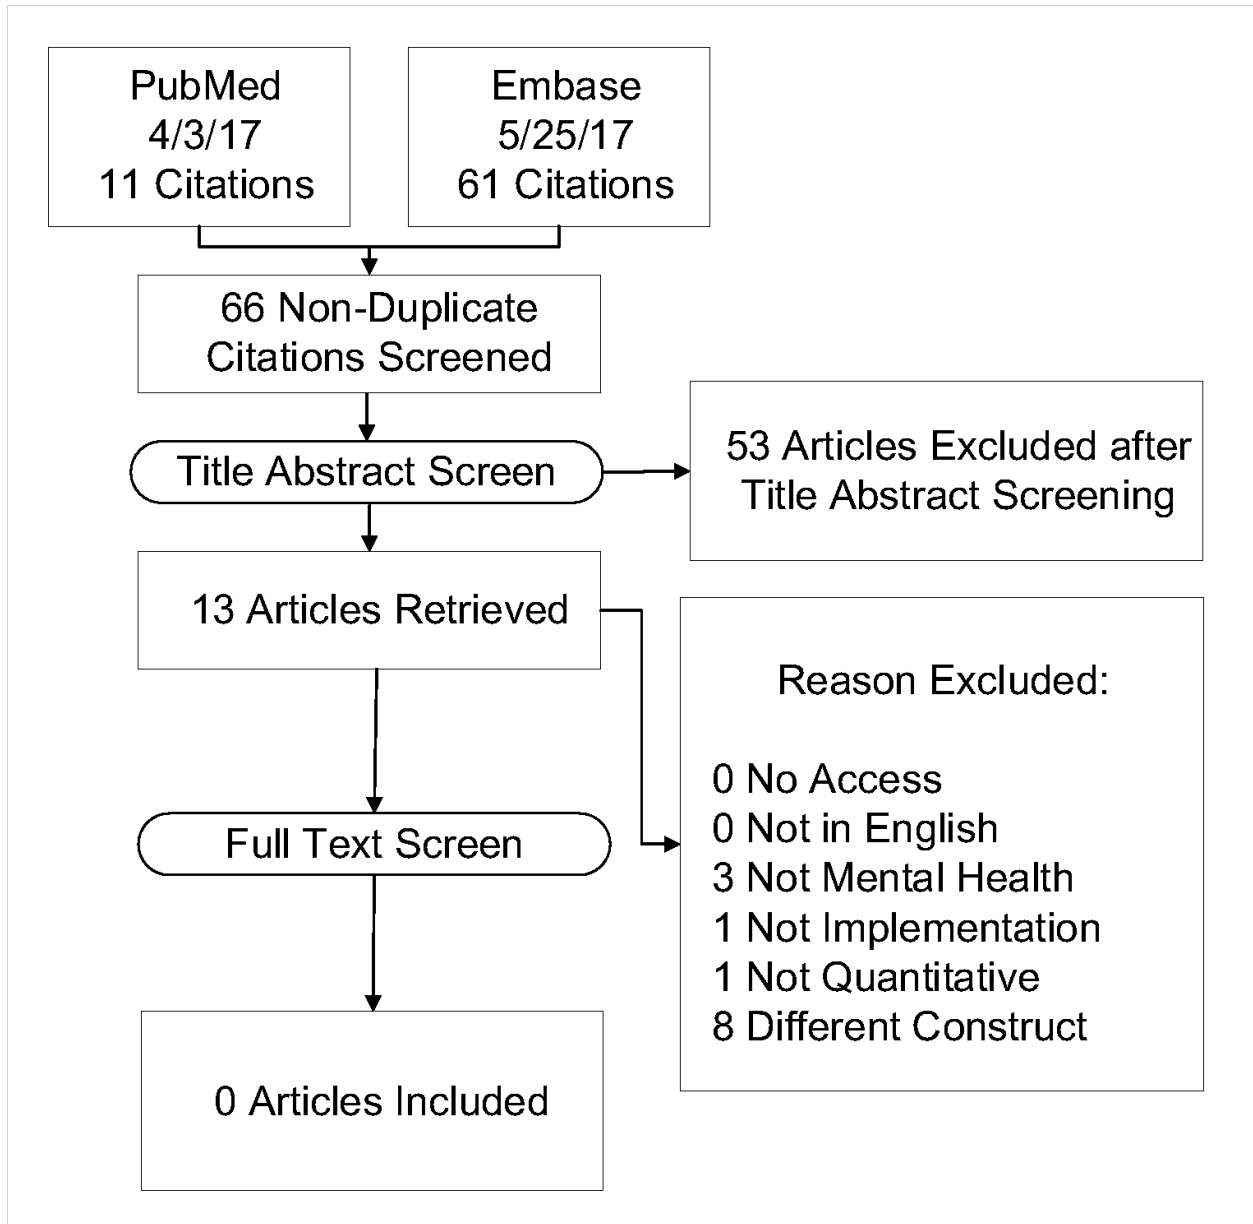

Supplement: sj-pdf-1-irp-10.1177_26334895211002474.pdf [file sj-pdf-1-irp-10.1177_26334895211002474.pdf]
